# Supplementary material
Source: publisher figshare collection journal article supplement (https://gsajournals.figshare.com/ndownloader/files/14206283)
Supplement: Supplementary file 1 [file 14206283]

## Sheet: Sheet1
Table S2. False positives identified by visual analysis of images in asi1Δ.
systematic name	standard name	localization in WT	manual score asi1∆ (>1.4)
YOR223W	DSC3	INM	FALSE POSITIVE
YJR054W	KCH1	INM	FALSE POSITIVE
YNR033W	ABZ1	INM	FALSE POSITIVE
YDR319C	YFT2	INM	FALSE POSITIVE
YGR032W	GSC2	NEGATIVE	FALSE POSITIVE
YFL062W	COS4	NEGATIVE	FALSE POSITIVE
YOR161C	PNS1	NEGATIVE	FALSE POSITIVE
YOL018C	TLG2	NEGATIVE	FALSE POSITIVE
YPR026W	ATH1	NEGATIVE	FALSE POSITIVE
YOR109W	INP53	NEGATIVE	FALSE POSITIVE
YJR143C	PMT4	NEGATIVE	FALSE POSITIVE
YLL051C	FRE6	NEGATIVE	FALSE POSITIVE
YKR065C	PAM17	NEGATIVE	FALSE POSITIVE
YDR381C-A	COI1	NEGATIVE	FALSE POSITIVE
YDR270W	CCC2	NEGATIVE	FALSE POSITIVE
YNL283C	WSC2	NEGATIVE	FALSE POSITIVE
YMR177W	MMT1	NEGATIVE	FALSE POSITIVE
YCR010C	ADY2	NEGATIVE	FALSE POSITIVE
YEL064C	AVT2	NEGATIVE	FALSE POSITIVE
YDR039C	ENA2	NEGATIVE	FALSE POSITIVE
YJR126C	VPS70	NEGATIVE	FALSE POSITIVE
YLR092W	SUL2	NEGATIVE	FALSE POSITIVE
YER141W	COX15	NEGATIVE	FALSE POSITIVE
YFR024C-A	LSB3	NEGATIVE	FALSE POSITIVE
YNR041C	COQ2	NEGATIVE	FALSE POSITIVE
YNL294C	RIM21	NEGATIVE	FALSE POSITIVE
YOR106W	VAM3	INM	FALSE POSITIVE
YNL275W	BOR1	INM	FALSE POSITIVE
YLL043W	FPS1	INM	FALSE POSITIVE
YDR468C	TLG1	INM	FALSE POSITIVE
YPL244C	HUT1	INM	FALSE POSITIVE
YBR294W	SUL1	INM	FALSE POSITIVE
YDR034W-B	YDR034W-B	INM	FALSE POSITIVE
YDR011W	SNQ2	INM	FALSE POSITIVE
YOL048C	RRT8	INM	FALSE POSITIVE
YJL094C	KHA1	INM	FALSE POSITIVE
YCR023C	YCR023C	INM	FALSE POSITIVE
YBR298C	MAL31	NEGATIVE	FALSE POSITIVE
YKL006C-A	SFT1	NEGATIVE	FALSE POSITIVE
YJR152W	DAL5	NEGATIVE	FALSE POSITIVE
YLR138W	NHA1	NEGATIVE	FALSE POSITIVE
YGL022W	STT3	NEGATIVE	FALSE POSITIVE
YGR138C	TPO2	NEGATIVE	FALSE POSITIVE
YMR279C	YMR279C	NEGATIVE	FALSE POSITIVE
YDR503C	LPP1	NEGATIVE	FALSE POSITIVE
YIL023C	YKE4	NEGATIVE	FALSE POSITIVE
YPL017C	IRC15	NEGATIVE	FALSE POSITIVE
YLR078C	BOS1	NEGATIVE	FALSE POSITIVE
YMR155W	YMR155W	NEGATIVE	FALSE POSITIVE
YJL037W	IRC18	NEGATIVE	FALSE POSITIVE
YIL037C	PRM2	NEGATIVE	FALSE POSITIVE
YER086W	ILV1	NEGATIVE	FALSE POSITIVE
YOL053W	AIM39	NEGATIVE	FALSE POSITIVE
YCR104W	PAU3	NEGATIVE	FALSE POSITIVE
YMR221C	FMP42	NEGATIVE	FALSE POSITIVE
YGL041C-B	YGL041C-B	NEGATIVE	FALSE POSITIVE
YML059C	NTE1	NEGATIVE	FALSE POSITIVE
YPL282C	PAU22	NEGATIVE	FALSE POSITIVE
YNL192W	CHS1	NEGATIVE	FALSE POSITIVE
YER005W	YND1	NEGATIVE	FALSE POSITIVE
YOR192C	THI72	NEGATIVE	FALSE POSITIVE
YPR061C	JID1	NEGATIVE	FALSE POSITIVE
YMR055C	BUB2	NEGATIVE	FALSE POSITIVE
YJL028W	YJL028W	NEGATIVE	FALSE POSITIVE
YMR160W	YMR160W	NEGATIVE	FALSE POSITIVE
YIL120W	QDR1	NEGATIVE	FALSE POSITIVE
YLR304C	ACO1	NEGATIVE	FALSE POSITIVE
YKR005C	YKR005C	NEGATIVE	FALSE POSITIVE
YCR037C	PHO87	NEGATIVE	FALSE POSITIVE
YHR050W	SMF2	NEGATIVE	FALSE POSITIVE
YGL230C	YGL230C	NEGATIVE	FALSE POSITIVE
YJL214W	HXT8	NEGATIVE	FALSE POSITIVE
YIL011W	TIR3	NEGATIVE	FALSE POSITIVE
YDR406W	PDR15	NEGATIVE	FALSE POSITIVE
YDR536W	STL1	NEGATIVE	FALSE POSITIVE
YLR205C	HMX1	NEGATIVE	FALSE POSITIVE
YDL248W	COS7	NEGATIVE	FALSE POSITIVE
YDR316W	OMS1	NEGATIVE	FALSE POSITIVE
YBR180W	DTR1	NEGATIVE	FALSE POSITIVE
YBR097W	VPS15	NEGATIVE	FALSE POSITIVE
YGR004W	PEX31	NEGATIVE	FALSE POSITIVE
YML115C	VAN1	NEGATIVE	FALSE POSITIVE
YLL006W	MMM1	NEGATIVE	FALSE POSITIVE
YKR106W	GEX2	NEGATIVE	FALSE POSITIVE
YIL013C	PDR11	NEGATIVE	FALSE POSITIVE
YDR407C	TRS120	NEGATIVE	FALSE POSITIVE
YDR504C	SPG3	NEGATIVE	FALSE POSITIVE
YDR438W	THI74	NEGATIVE	FALSE POSITIVE
YCR068W	ATG15	NEGATIVE	FALSE POSITIVE
YDL035C	GPR1	NEGATIVE	FALSE POSITIVE
YFL018C	LPD1	NEGATIVE	FALSE POSITIVE
YPL231W	FAS2	NEGATIVE	FALSE POSITIVE
YJR095W	SFC1	NEGATIVE	FALSE POSITIVE
YHR048W	YHK8	NEGATIVE	FALSE POSITIVE
YKL073W	LHS1	NEGATIVE	FALSE POSITIVE
YHR150W	PEX28	NEGATIVE	FALSE POSITIVE
YBL075C	SSA3	NEGATIVE	FALSE POSITIVE
YGL006W	PMC1	NEGATIVE	FALSE POSITIVE
YNL318C	HXT14	NEGATIVE	FALSE POSITIVE
YOR332W	VMA4	NUCLEAR	FALSE POSITIVE
YNR008W	LRO1	NUCLEAR	FALSE POSITIVE
YPR098C	TMH18	NUCLEAR	FALSE POSITIVE
YHL002W	HSE1	NUCLEAR	FALSE POSITIVE
YLR063W	BMT6	NUCLEAR	FALSE POSITIVE
YFL010C	WWM1	NUCLEAR	FALSE POSITIVE
